# Supplementary figures and images for: Comprehensive characterization of neutrophil genome topology
Source: PubMed Central journal article supplement — Genes Dev. 2017 Jan 15;31(2):141–53. doi: 10.1101/gad.293910.116 (PMC5322729; doi:10.1101/gad.293910.116), 2017-01-15

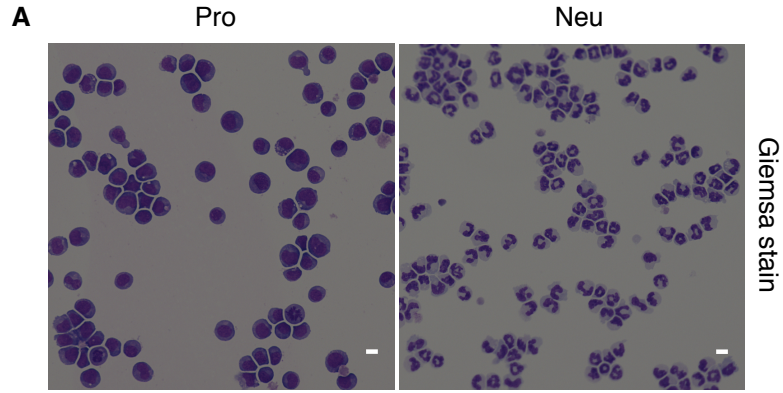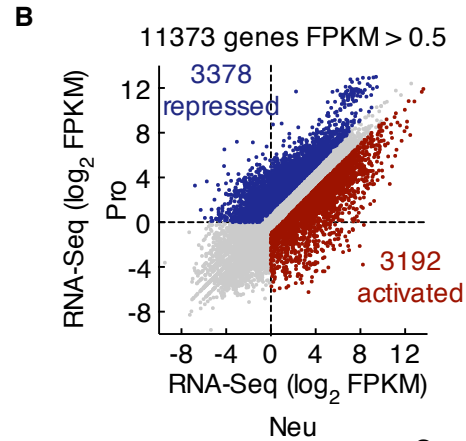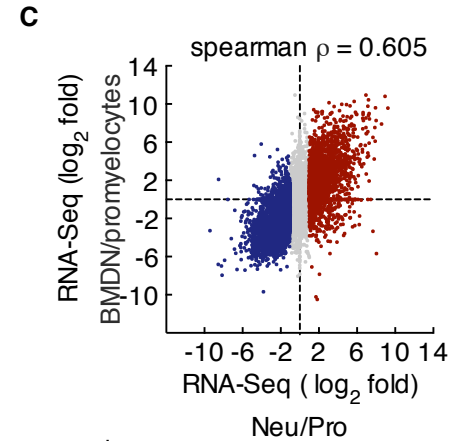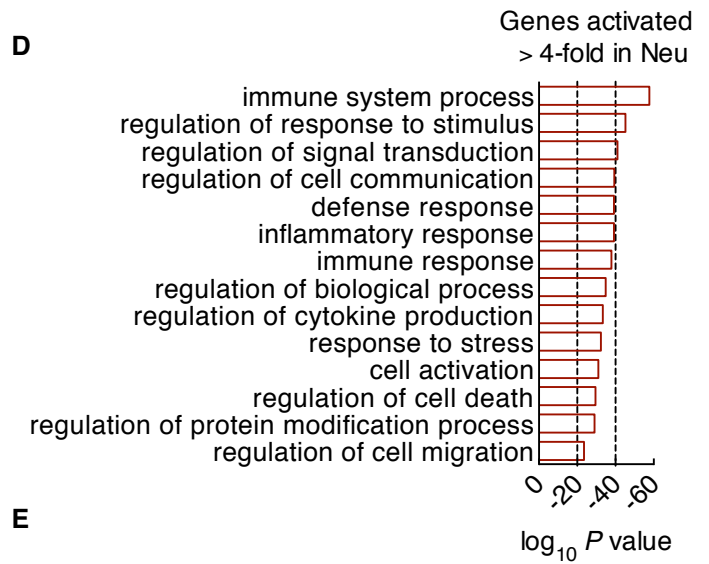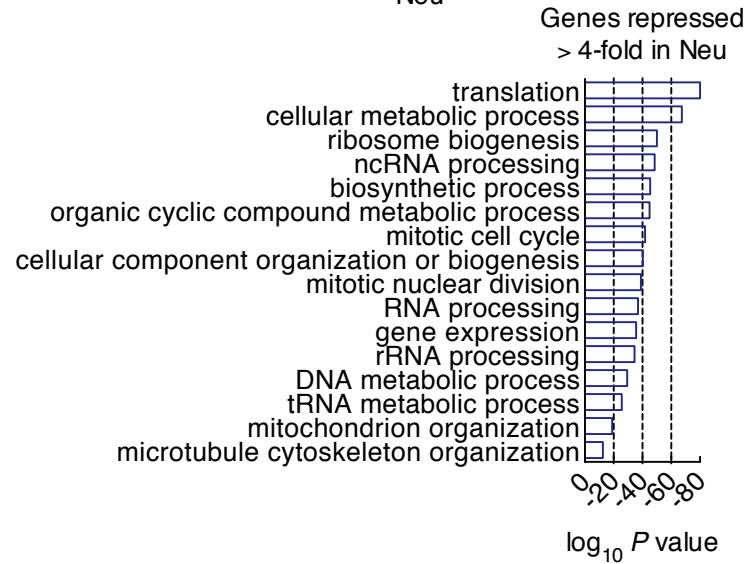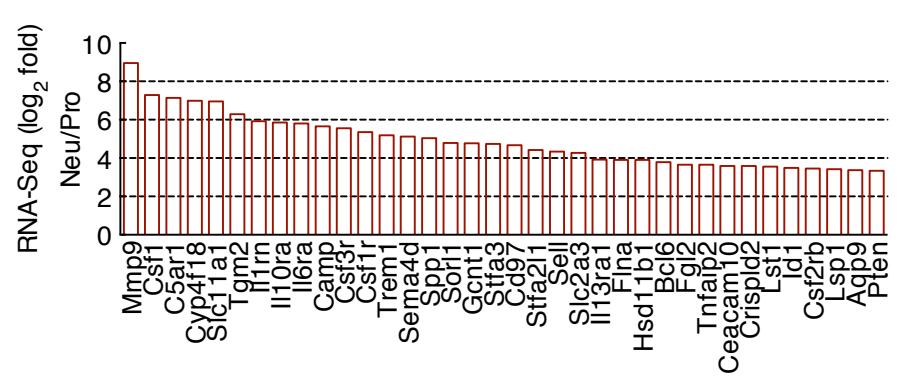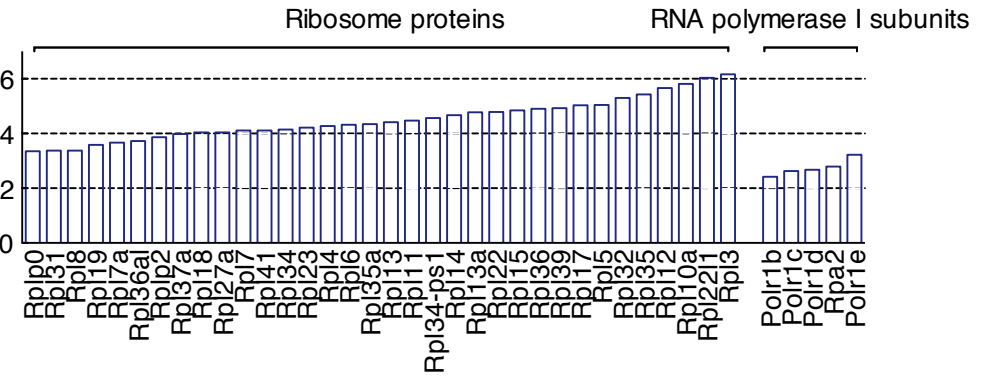

Supplement: supp_gad.293910.116_Supplemental_FigS1.pdf [file supp_gad.293910.116_Supplemental_FigS1.pdf]

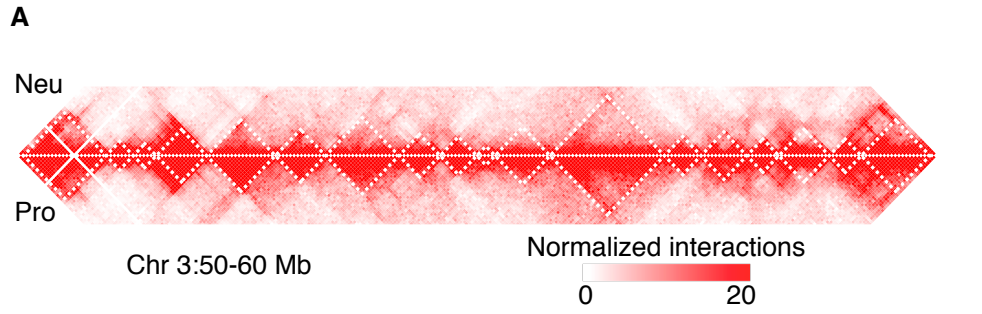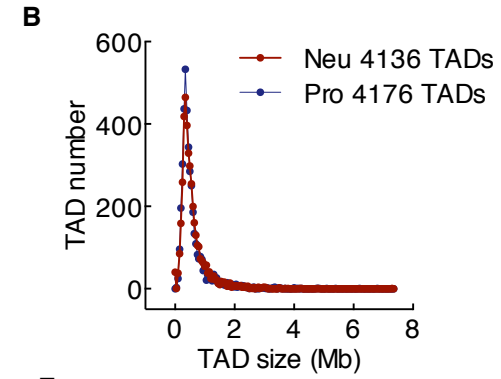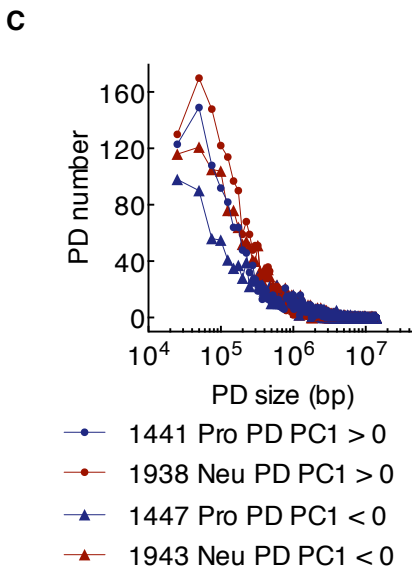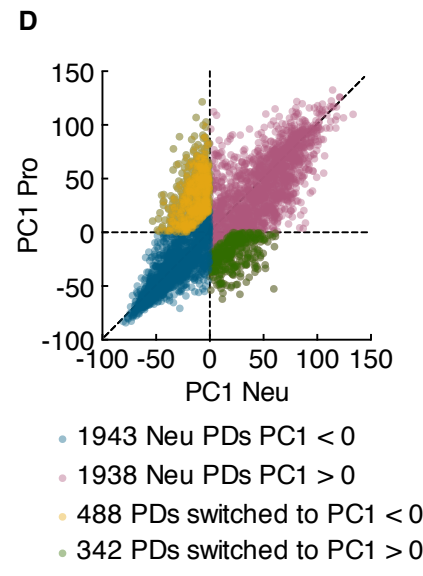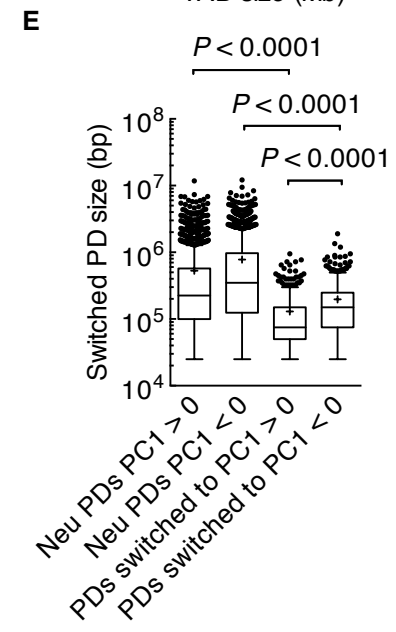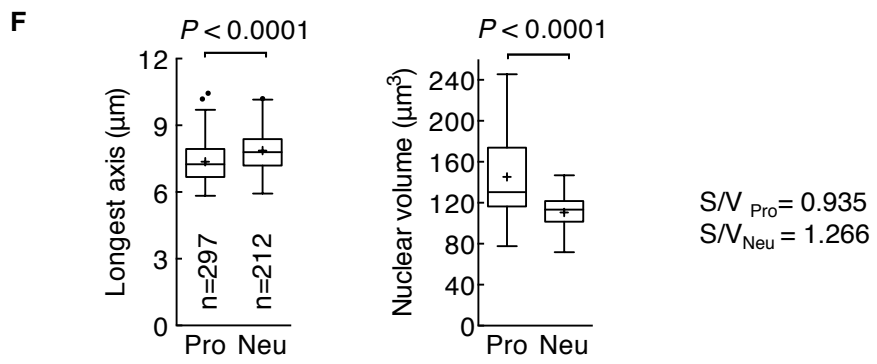

Supplement: supp_gad.293910.116_Supplemental_FigS2.pdf [file supp_gad.293910.116_Supplemental_FigS2.pdf]

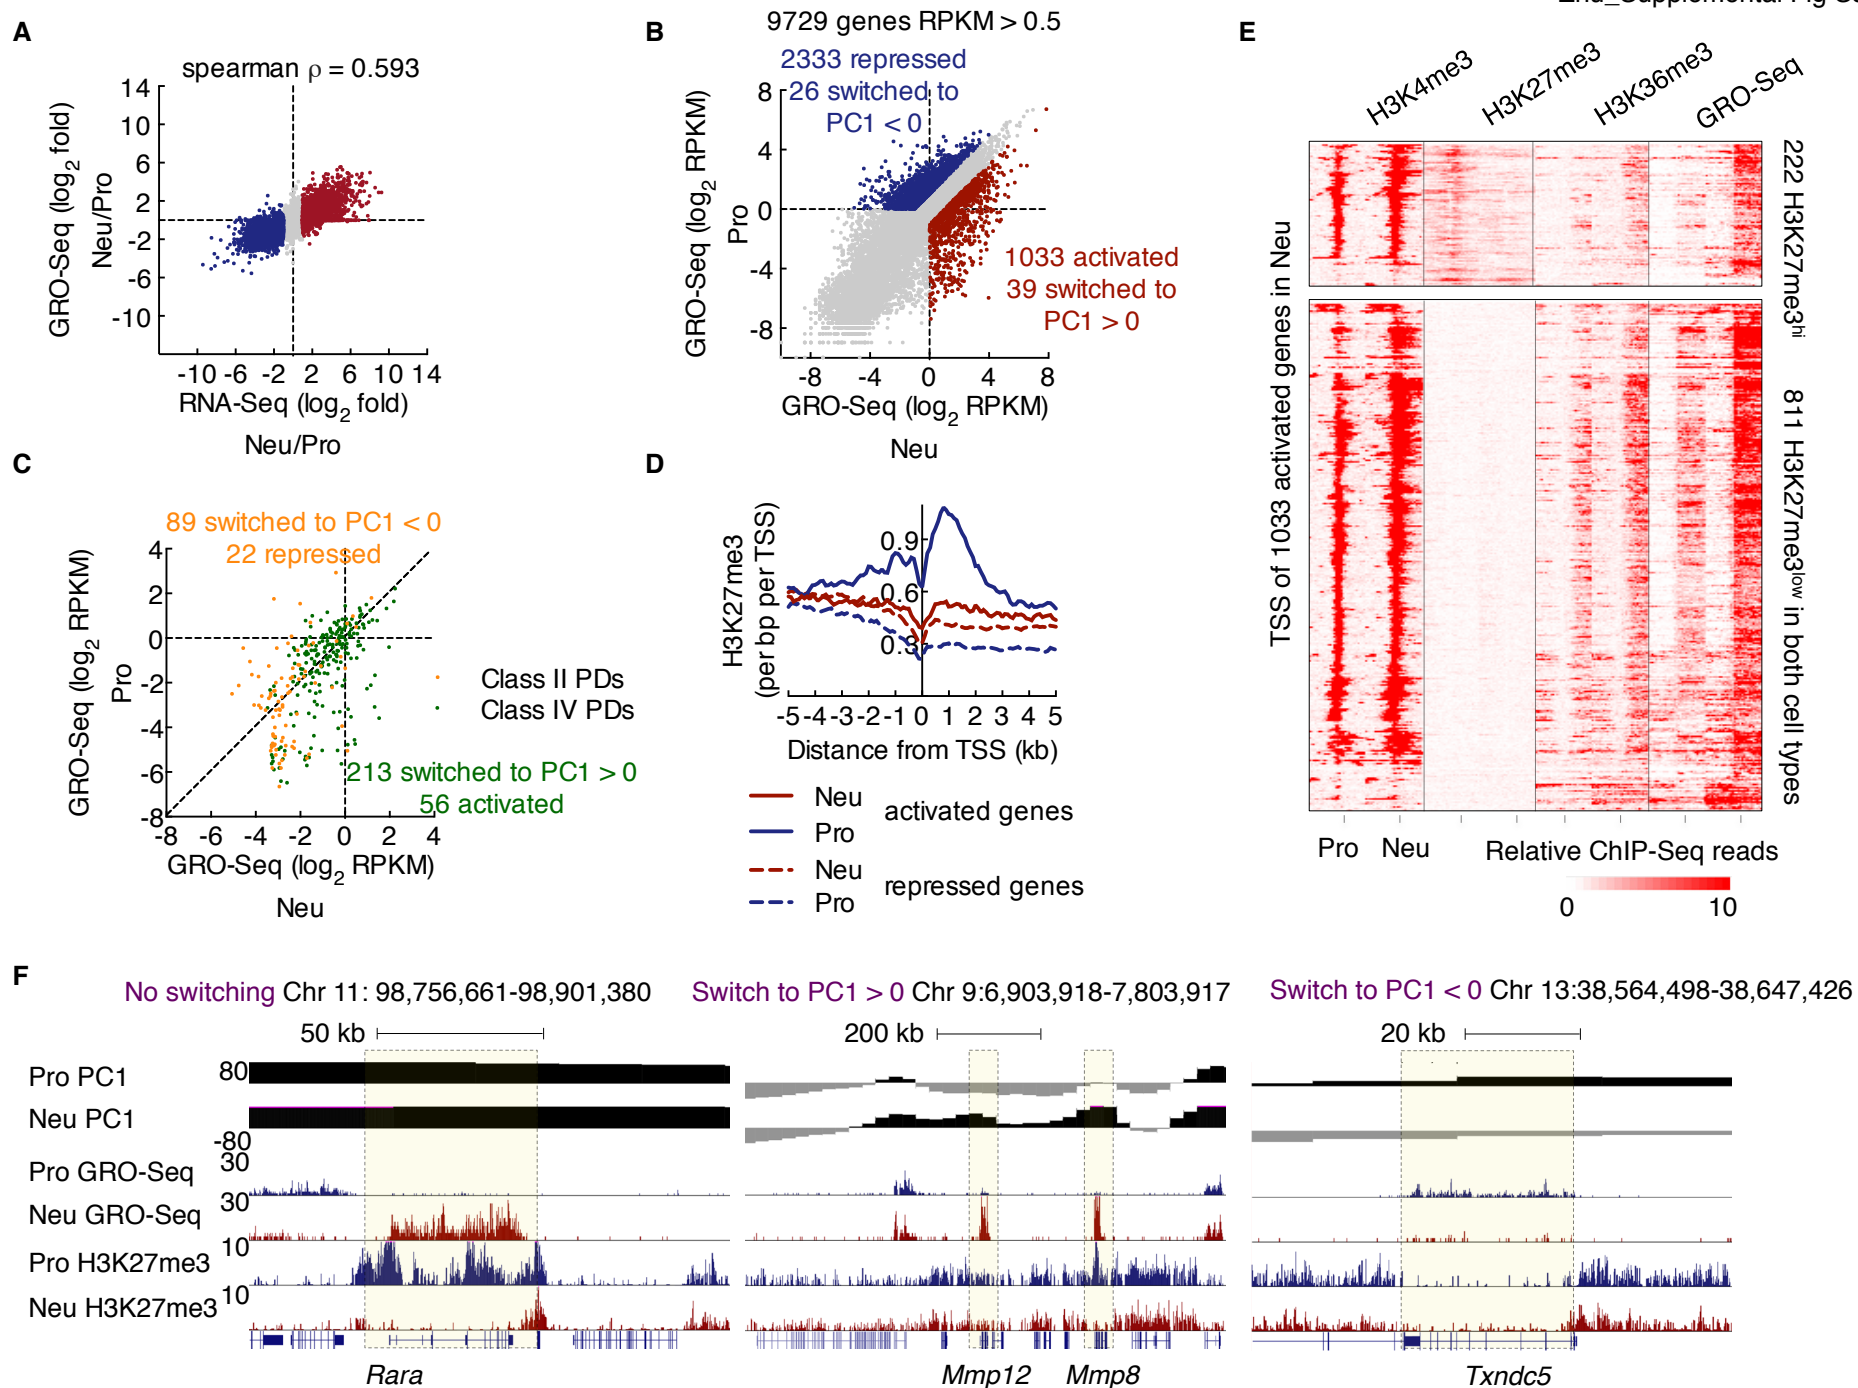

Supplement: supp_gad.293910.116_Supplemental_FigS3.pdf [file supp_gad.293910.116_Supplemental_FigS3.pdf]

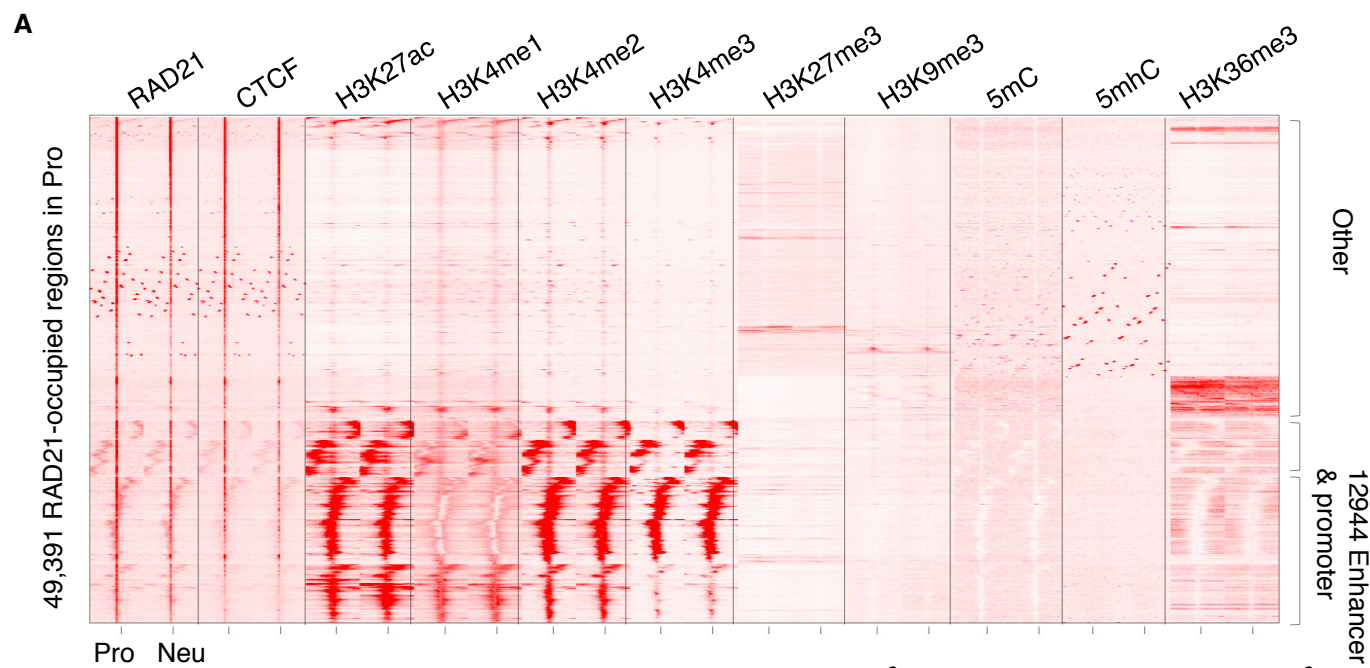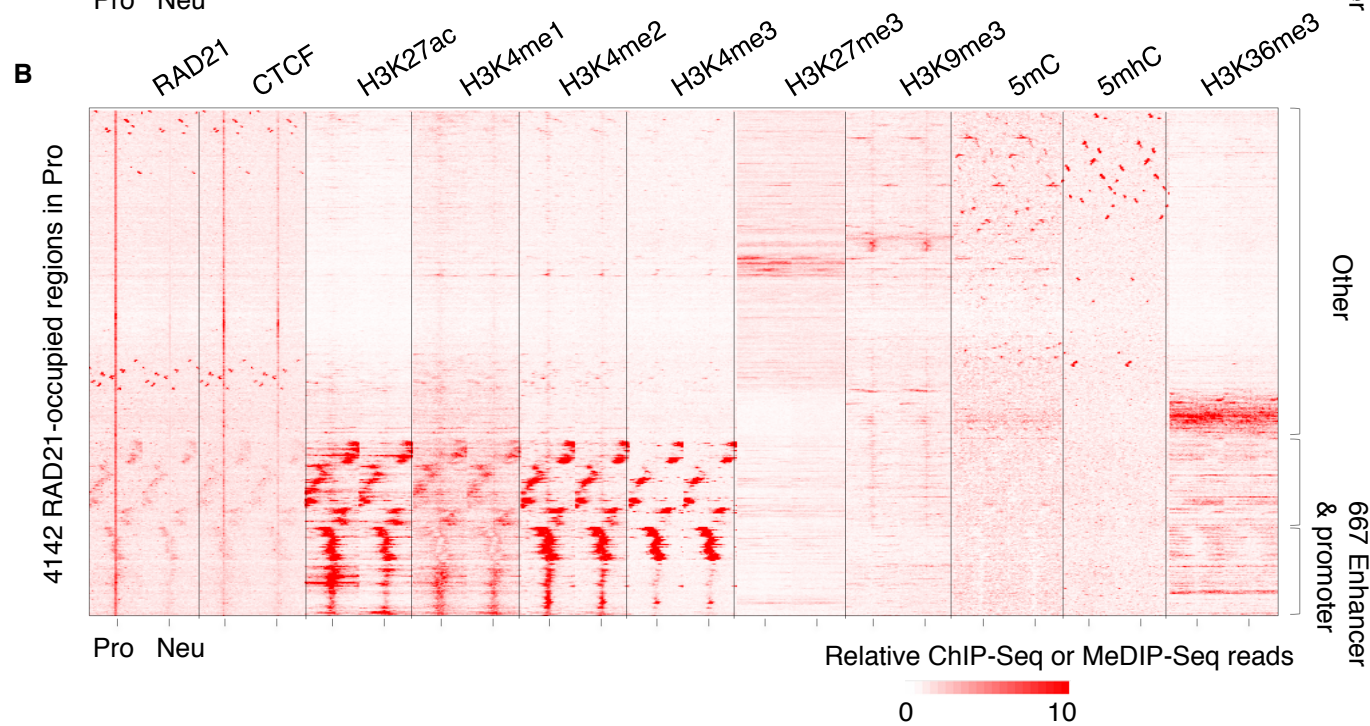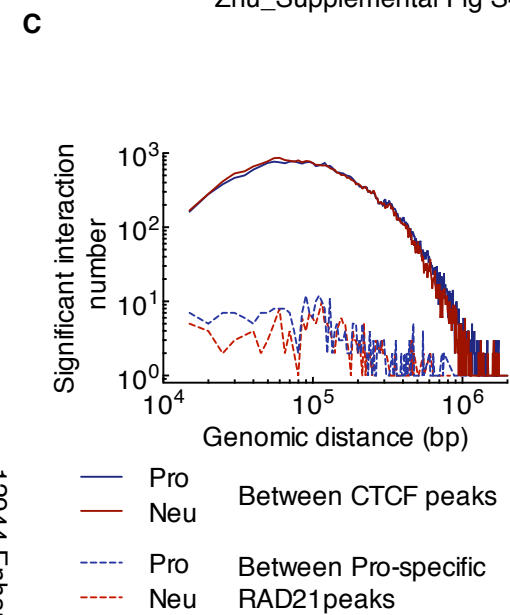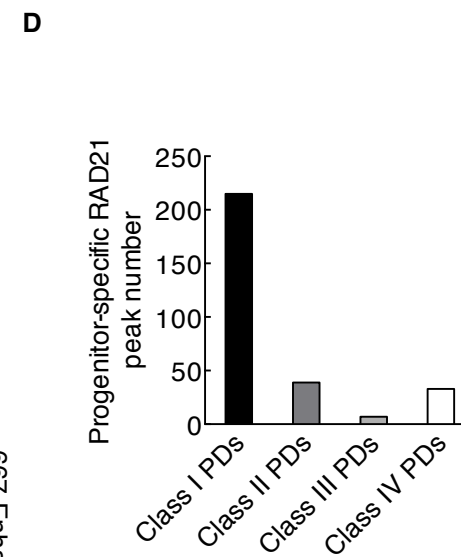

Supplement: supp_gad.293910.116_Supplemental_FigS4.pdf [file supp_gad.293910.116_Supplemental_FigS4.pdf]

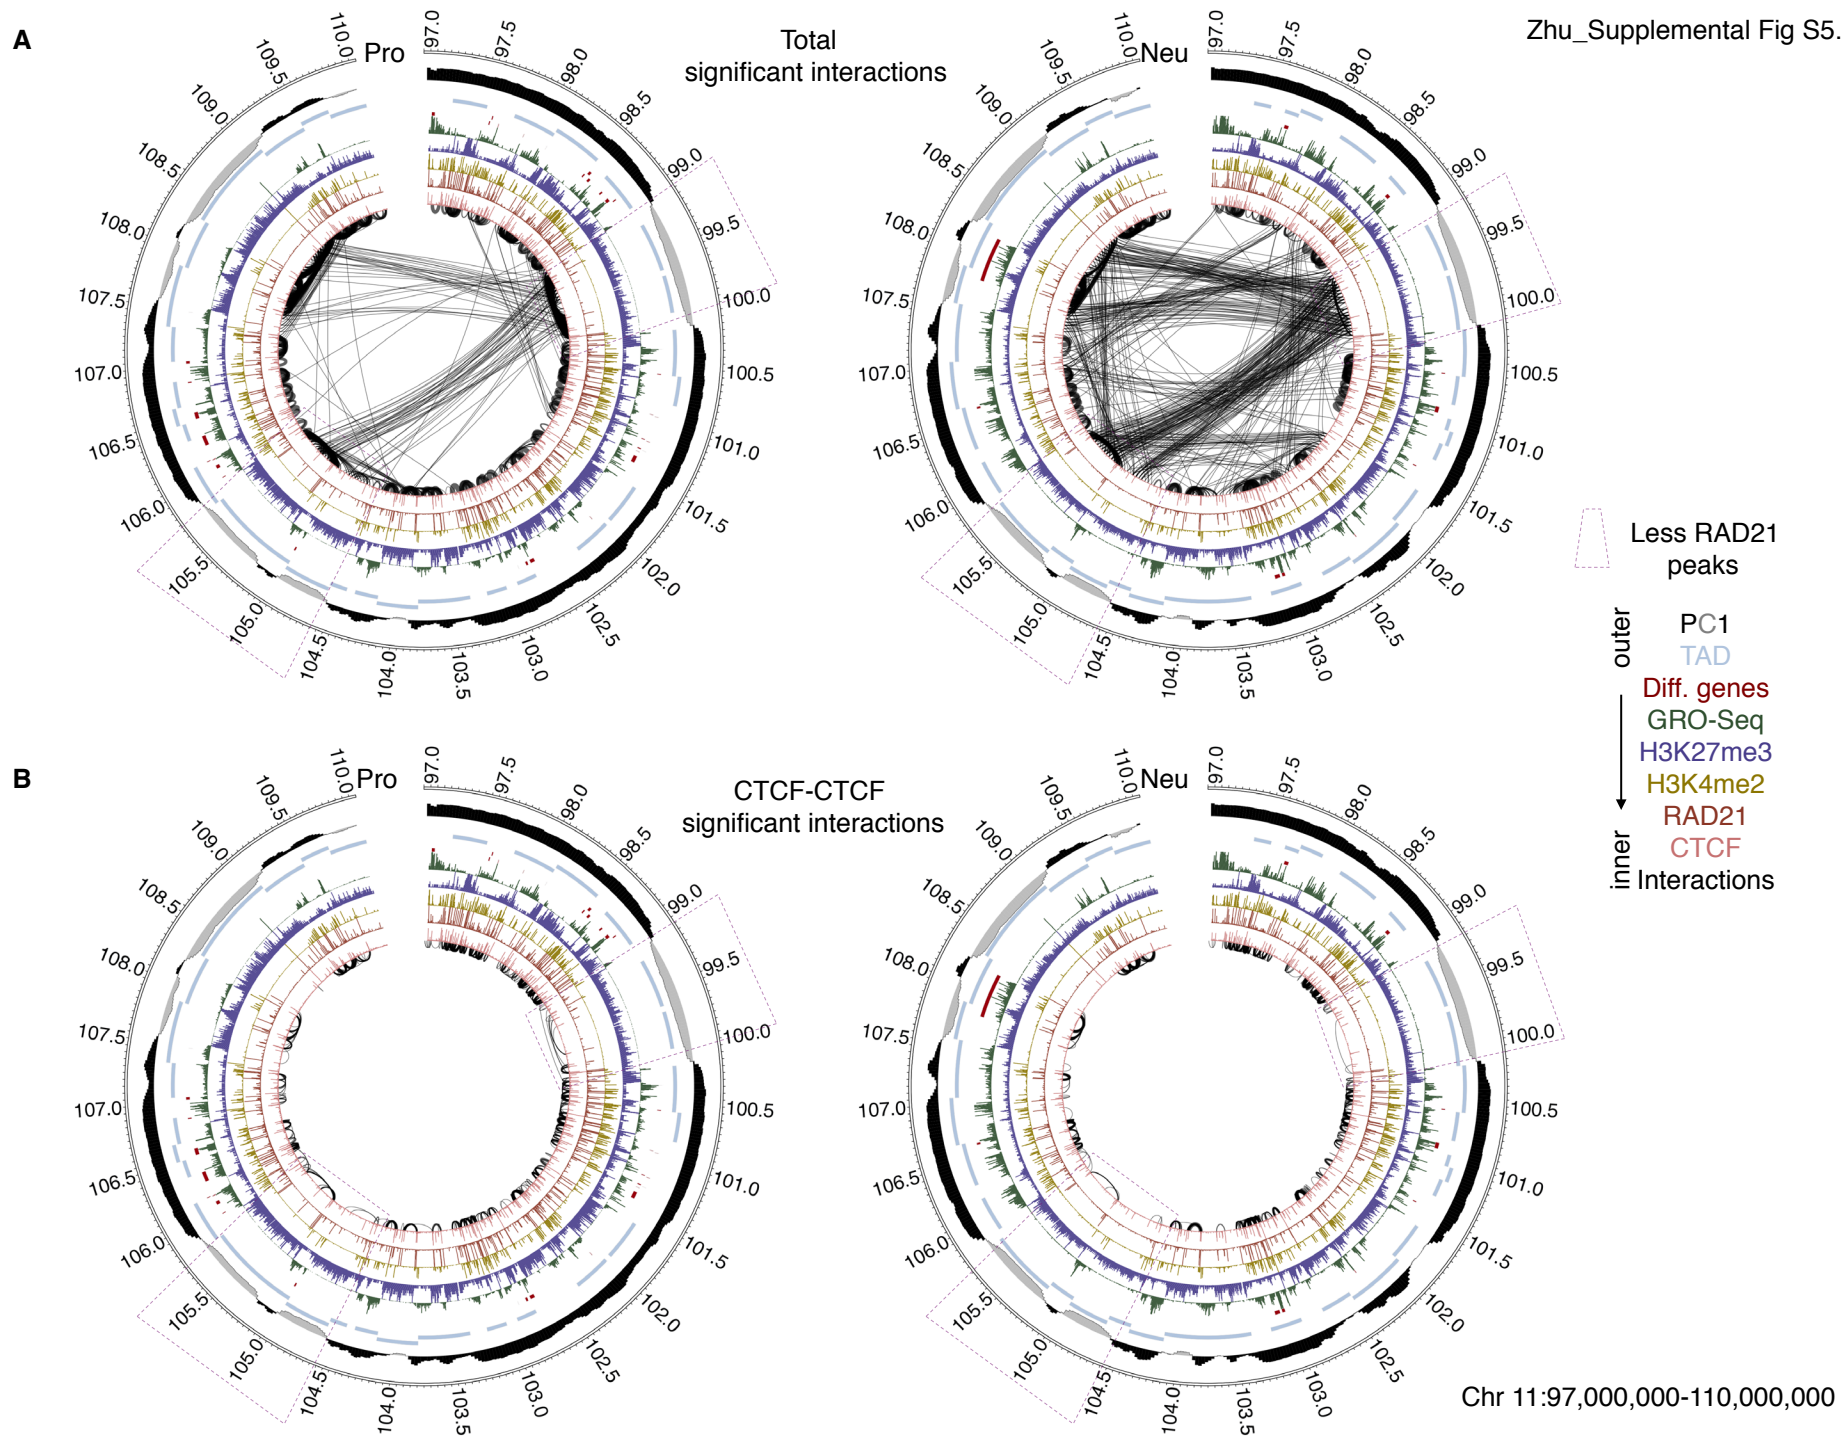

Supplement: supp_gad.293910.116_Supplemental_FigS5.pdf [file supp_gad.293910.116_Supplemental_FigS5.pdf]

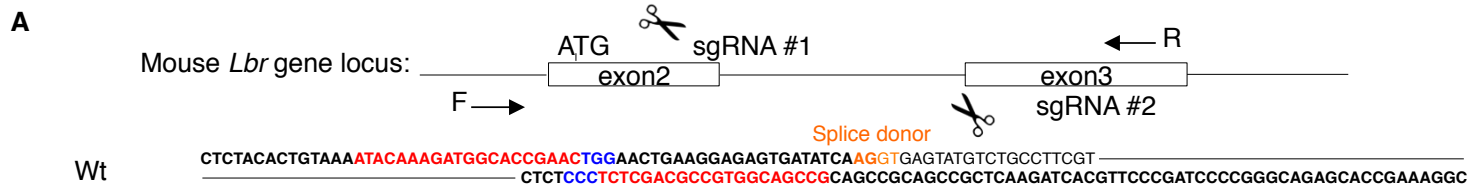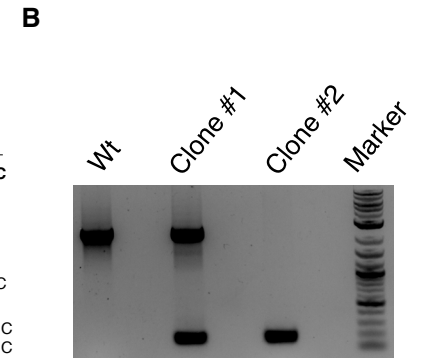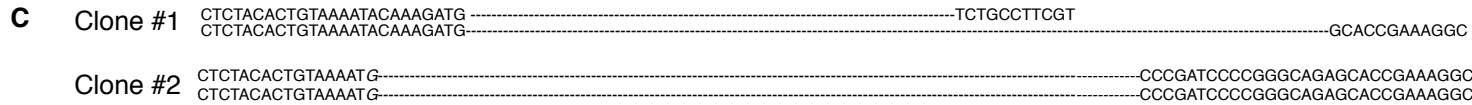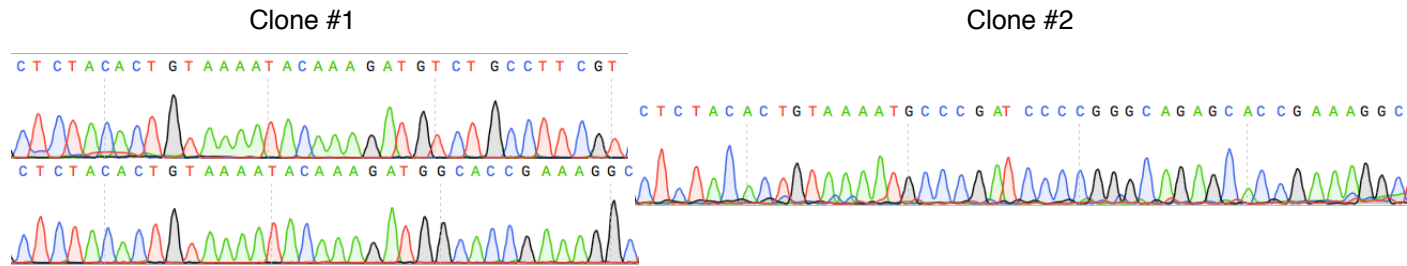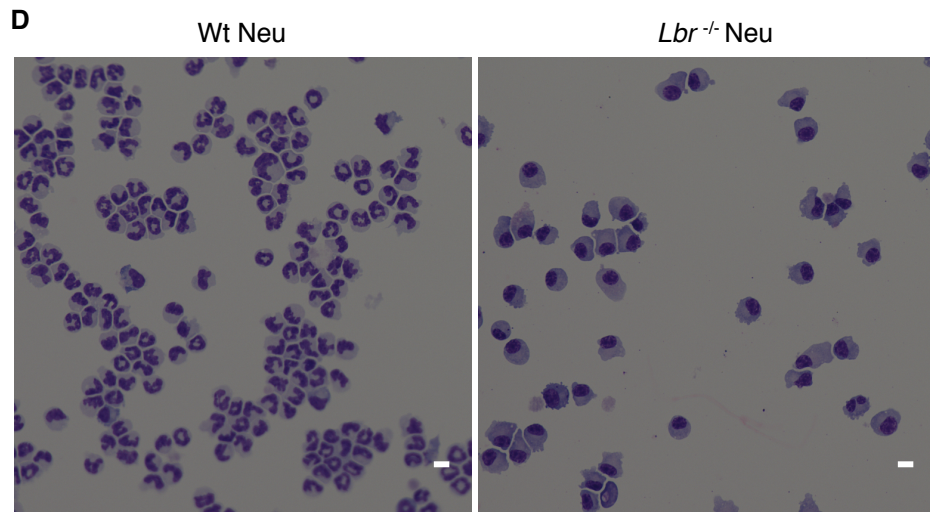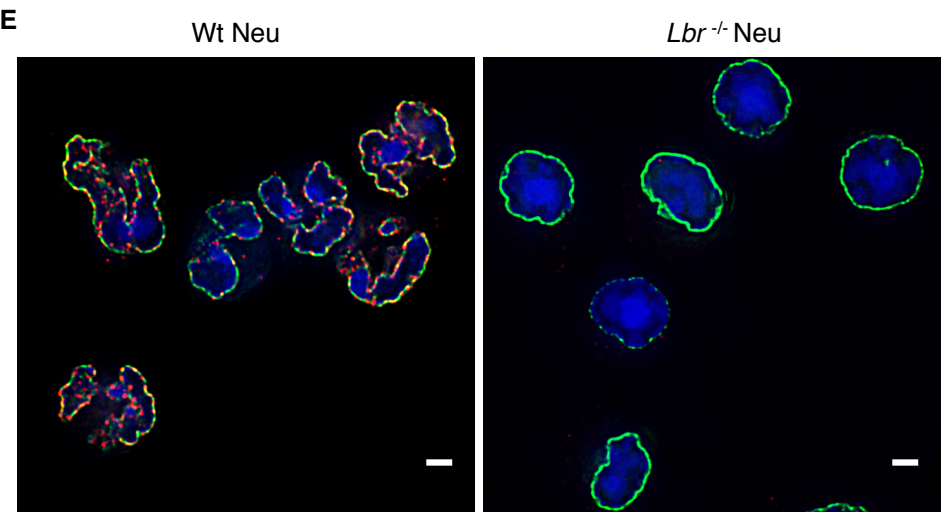

Giemsa stain

Lamin B1 LBR DAPI  
 Section View

Supplement: supp_gad.293910.116_Supplemental_FigS6.pdf [file supp_gad.293910.116_Supplemental_FigS6.pdf]

**A**

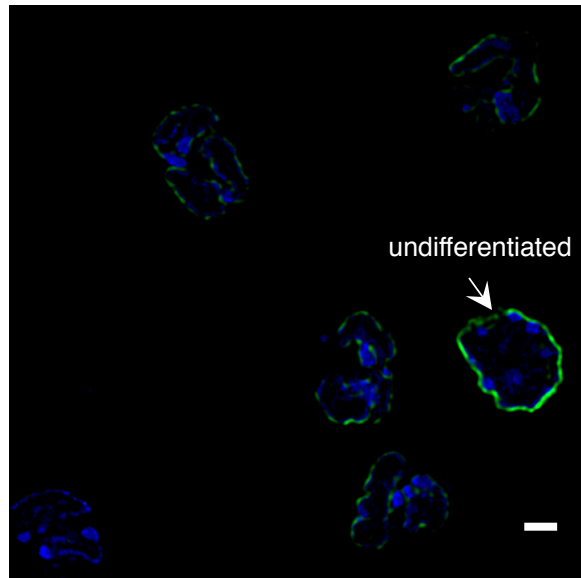

Lamin B1 DAPI  
Section view

**C**

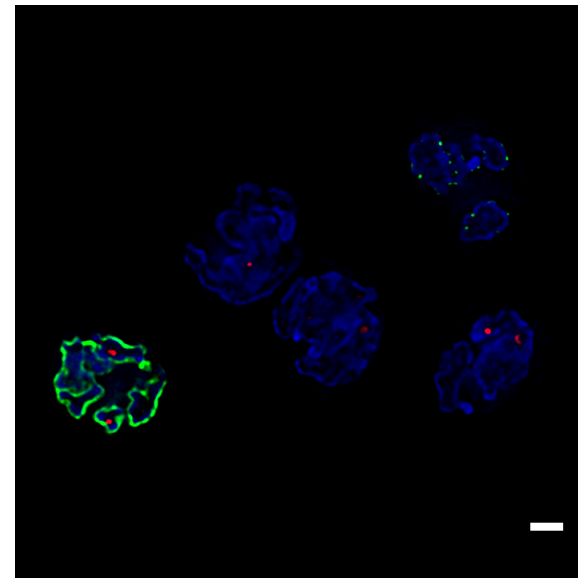

**B**

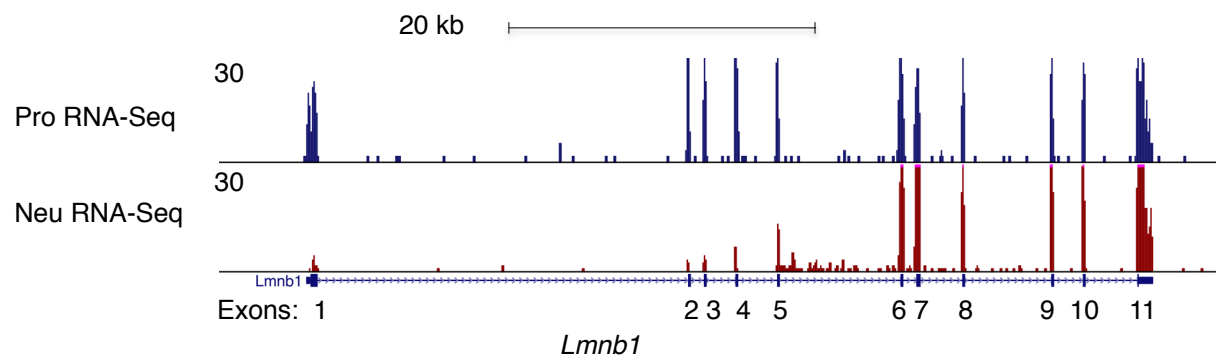

Supplement: supp_gad.293910.116_Supplemental_FigS7.pdf [file supp_gad.293910.116_Supplemental_FigS7.pdf]

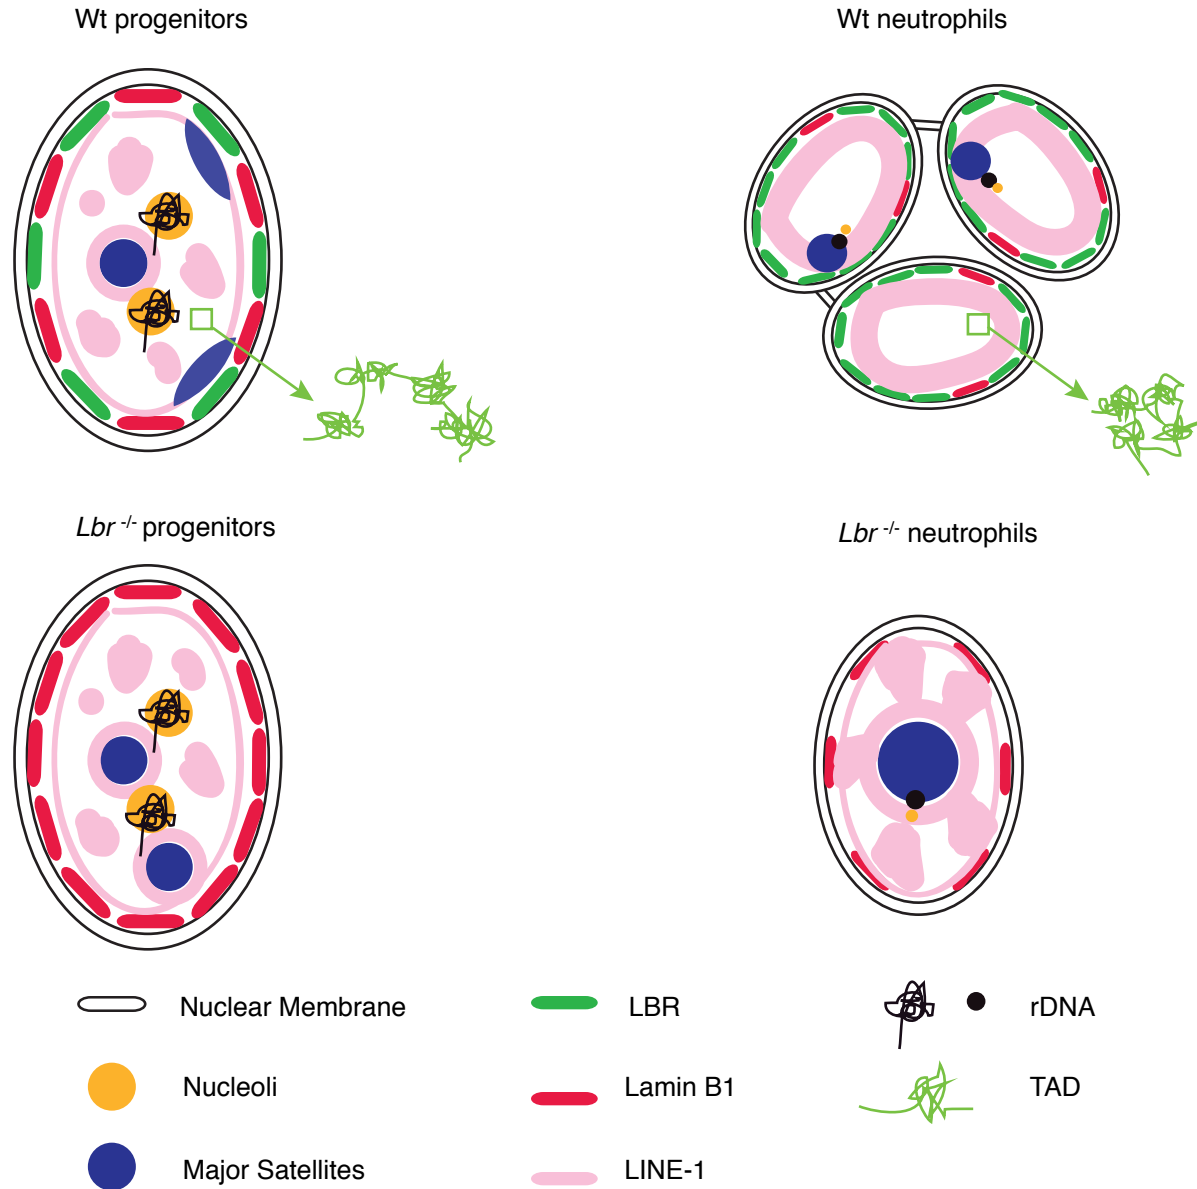

Supplement: supp_gad.293910.116_Supplemental_FigS8.pdf [file supp_gad.293910.116_Supplemental_FigS8.pdf]
